# Supplementary material for: An amino acid-based oral rehydration solution (AA-ORS) enhanced intestinal epithelial proliferation in mice exposed to radiation
Source: PubMed Central journal article supplement (PMC5120277; doi:10.1038/srep37220), 2016-11-23
Supplement: srep37220-s1.pdf [file srep37220-s1.pdf]

**An amino acid-based oral rehydration solution (AA-ORS) enhanced intestinal epithelial proliferation in mice exposed to radiation**

Liangjie Yin,<sup>1</sup> Reshu Gupta<sup>1</sup>, Lauren Vaught<sup>1</sup>, Astrid Grosche<sup>1</sup>, Paul Okunieff,<sup>1</sup>

Sadasivan Vidyasagar<sup>1\*</sup>

<sup>1</sup>Department of Radiation Oncology, University of Florida Health Cancer Center, Cancer and Genetics Research Complex, 2033 Mowry Road, Box 103633, Gainesville, FL 32610

**\*Corresponding author:**

Sadasivan Vidyasagar, PhD

Department of Radiation Oncology

University of Florida Health Cancer Center

Cancer and Genomic Research Complex

2033 Mowry Rd.

Box 103633

Gainesville, FL 32610

E-mail: [vidyasagar@ufl.edu](mailto:vidyasagar@ufl.edu)

Telephone: (352) 294-5061; Fax: (352) 265-7045

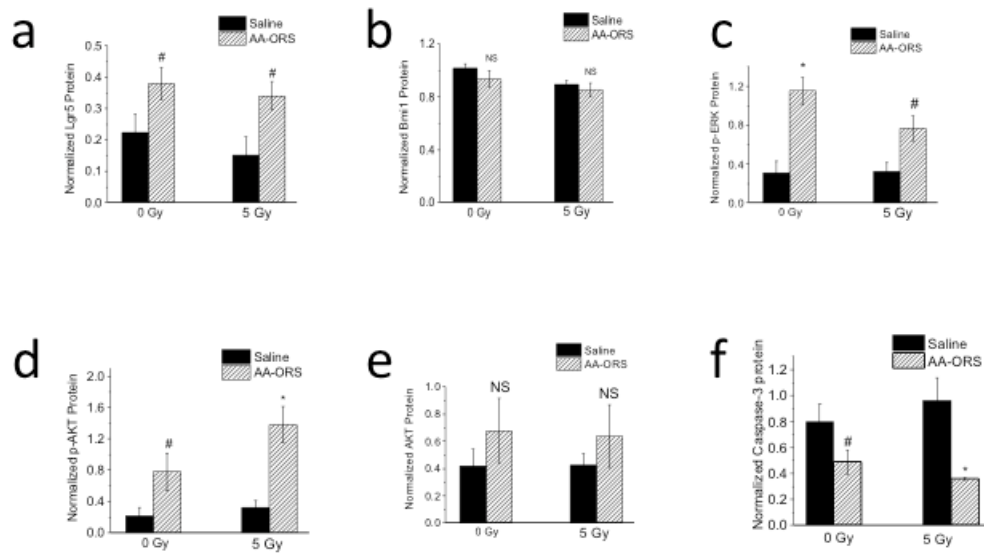

**Supplementary Figure 1:** Graph showing protein density for Lgr5, Bmi1, p-ERK, p-AKT, AKT and Caspase-3. Protein density was normalized to coomassie blue. Mice treated with saline are shown as black bars and AA-ORS treated are shown as hatched bars following 0 or 5 Gy irradiation. (Values are means  $\pm$  SEM from  $n = 4$  different mice repeated in triplicate. #  $P < 0.05$  compared with saline control).

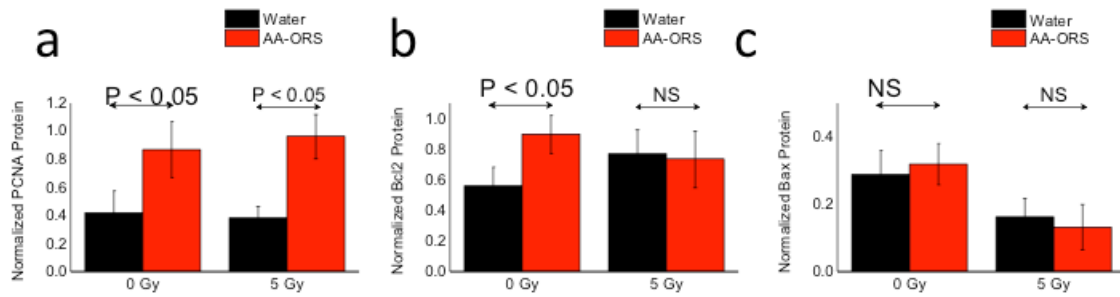

**Supplementary Figure 2:** Graph showing protein density for PCNA, Bcl-2, Bax. Protein density was normalized to coomassie blue. Mice treated with saline are shown as black bars and AA-ORS treated are shown as red bars following 0 or 5 Gy irradiation. (Values are means  $\pm$  SEM from  $n = 4$  different mice repeated in triplicate. #  $P < 0.05$  compared with saline control).
